# Supplementary material for: Performance and biocompatibility of OSTEMER 322 in cell-based microfluidic applications
Source: Royal Society of Chemistry journal article supplement (doi:10.1039/d3ra05789e), 2024-01-01
Supplement: d3ra05789e1.pdf [file d3ra05789e1.pdf]

## Supplemental information for

# Performance and biocompatibility of OSTEMER 322 in cell-based microfluidic applications

### Authors:

Petr Aubrecht,<sup>1#</sup> Jiří Smejkal,<sup>1</sup> Petr Panuška,<sup>1</sup> Klára Španbauerová,<sup>1</sup> Viktorie Neubertová,<sup>1</sup> Pavel Kaule,<sup>1,2</sup> Jindřich Matoušek,<sup>3</sup> Stanislav Vinopal,<sup>1</sup> Michaela Liegertová,<sup>1</sup> Marcel Štofík,<sup>1</sup> and Jan Malý<sup>1#</sup>

### Affiliations:

<sup>1</sup>Centre for Nanomaterials and Biotechnology, Faculty of Science, Jan Evangelista Purkyně University in Ústí nad Labem, Pasteurova 3632/15, 400 96 Ústí nad Labem, Czech Republic

<sup>2</sup>Department of Chemistry, Faculty of Science, Jan Evangelista Purkyně University in Ústí nad Labem, Pasteurova 3632/15, 400 96 Ústí nad Labem, Czech Republic

<sup>3</sup>Department of Physics, Faculty of Science, Jan Evangelista Purkyně University in Ústí nad Labem, Pasteurova 3632/15, 400 96 Ústí nad Labem, Czech Republic

### #Corresponding authors:

Petr Aubrecht, email: petr.aubrecht@ujep.cz

Jan Malý, email: malyjalga@seznam.cz

Centre for Nanomaterials and Biotechnology

Jan Evangelista Purkyně University in Ústí nad Labem

Pasteurova 3632/15

400 96, Ústí nad Labem, Czech Republic

## Results

**Tab. S1:** The elemental composition determined through the analysis of X-ray photoelectron spectroscopy (XPS) spectra. The data are presented as mean  $\pm$  SD ( $n = 3$ ). The samples marked with an asterisk "\*" have undergone plasma treatment, while the samples marked with a hashtag "#" means oste322 inserts prepared from PDMS mould. Elements with "n.d." were not detected.

|                | C [at. %]      | O [at. %]      | S [at. %]     | N [at. %]      | F [at. %]      | Si [at. %]    | Na [at. %]    | Cl [at. %]    |
|----------------|----------------|----------------|---------------|----------------|----------------|---------------|---------------|---------------|
| Sample         | C 1s           | O 1s           | S 2p          | N 1s           | F 1s           | Si 2p         | Na 1s         | Cl 2p         |
| Oste322        | 66.5 $\pm$ 0.1 | 21.5 $\pm$ 0.3 | 7.1 $\pm$ 0.1 | 4.9 $\pm$ 0.3  | n.d.           | n.d.          | n.d.          | n.d.          |
| Oste322*       | 56.8 $\pm$ 0.8 | 29.0 $\pm$ 0.4 | 7.5 $\pm$ 0.3 | 6.6 $\pm$ 0.5  | n.d.           | n.d.          | n.d.          | n.d.          |
| Oste322#       | 64.1 $\pm$ 5.7 | 22.5 $\pm$ 2.5 | 3.2 $\pm$ 0.7 | 2.7 $\pm$ 0.3  | n.d.           | 7.6 $\pm$ 2.6 | n.d.          | n.d.          |
| Oste322##      | 44.3 $\pm$ 2.9 | 38.2 $\pm$ 2.7 | 4.2 $\pm$ 0.5 | 3.9 $\pm$ 0.7  | n.d.           | 9.4 $\pm$ 1.1 | n.d.          | n.d.          |
| Fluo-ST2       | 35.5 $\pm$ 6.6 | 17.3 $\pm$ 0.7 | 0.3 $\pm$ 0.5 | 1.3 $\pm$ 0.2  | 43.7 $\pm$ 7.4 | 1.8 $\pm$ 0.5 | n.d.          | n.d.          |
| Fluo-ST2*      | 32.3 $\pm$ 1.2 | 17.5 $\pm$ 0.7 | n.d.          | 1.4 $\pm$ 0.2  | 46.9 $\pm$ 1.7 | 2.0 $\pm$ 0.3 | n.d.          | n.d.          |
| Collagen I     | 59.7 $\pm$ 2.1 | 22.8 $\pm$ 0.7 | 2.9 $\pm$ 0.3 | 6.8 $\pm$ 2.0  | n.d.           | 5.6 $\pm$ 2.6 | 1.0 $\pm$ 1.0 | 1.1 $\pm$ 1.0 |
| Collagen I*    | 59.7 $\pm$ 4.8 | 25.3 $\pm$ 1.6 | 3.6 $\pm$ 0.9 | 6.3 $\pm$ 0.6  | n.d.           | 2.4 $\pm$ 1.9 | 1.7 $\pm$ 1.5 | 1.1 $\pm$ 1.0 |
| Collagen II    | 60.4 $\pm$ 4.6 | 21.3 $\pm$ 1.2 | 1.4 $\pm$ 0.1 | 10.5 $\pm$ 0.8 | n.d.           | 2.2 $\pm$ 1.0 | 2.2 $\pm$ 1.9 | 1.9 $\pm$ 2.0 |
| Collagen II*   | 61.2 $\pm$ 5.0 | 21.5 $\pm$ 3.5 | 1.0 $\pm$ 0.3 | 10.7 $\pm$ 1.4 | n.d.           | 2.4 $\pm$ 0.8 | 1.7 $\pm$ 0.8 | 1.5 $\pm$ 1.3 |
| Collagen IV    | 64.2 $\pm$ 0.4 | 22.0 $\pm$ 1.2 | 3.3 $\pm$ 0.6 | 6.8 $\pm$ 1.9  | n.d.           | 2.5 $\pm$ 0.3 | 0.5 $\pm$ 0.9 | 0.7 $\pm$ 1.1 |
| Collagen IV*   | 54.9 $\pm$ 7.8 | 28.0 $\pm$ 4.2 | 3.1 $\pm$ 0.5 | 5.0 $\pm$ 0.5  | n.d.           | 5.1 $\pm$ 0.6 | 2.6 $\pm$ 2.3 | 1.3 $\pm$ 2.3 |
| Elastin        | 65.8 $\pm$ 1.4 | 19.6 $\pm$ 0.9 | 2.8 $\pm$ 0.4 | 8.1 $\pm$ 1.6  | n.d.           | 2.9 $\pm$ 2.1 | 0.3 $\pm$ 0.6 | 0.4 $\pm$ 0.7 |
| Elastin*       | 59.5 $\pm$ 5.9 | 23.2 $\pm$ 3.5 | 3.3 $\pm$ 0.5 | 8.2 $\pm$ 1.4  | n.d.           | 3.6 $\pm$ 2.2 | 1.2 $\pm$ 1.3 | 1.0 $\pm$ 1.8 |
| Fibronectin    | 60.4 $\pm$ 2.7 | 21.2 $\pm$ 0.9 | 3.0 $\pm$ 0.9 | 6.9 $\pm$ 0.7  | n.d.           | 4.0 $\pm$ 2.3 | 2.4 $\pm$ 0.9 | 2.0 $\pm$ 2.5 |
| Fibronectin*   | 53.5 $\pm$ 4.1 | 26.7 $\pm$ 2.4 | 3.5 $\pm$ 1.6 | 6.9 $\pm$ 1.3  | n.d.           | 3.4 $\pm$ 2.3 | 4.0 $\pm$ 0.9 | 2.1 $\pm$ 2.2 |
| Laminin        | 63.1 $\pm$ 2.6 | 21.8 $\pm$ 1.5 | 4.0 $\pm$ 0.1 | 4.7 $\pm$ 1.0  | n.d.           | 5.2 $\pm$ 2.3 | 0.9 $\pm$ 0.9 | 0.3 $\pm$ 0.6 |
| Laminin*       | 60.8 $\pm$ 3.7 | 24.6 $\pm$ 2.9 | 3.1 $\pm$ 0.2 | 3.2 $\pm$ 0.3  | n.d.           | 5.5 $\pm$ 1.5 | 1.1 $\pm$ 1.2 | 1.6 $\pm$ 1.8 |
| Poly-L-Lysine  | 62.4 $\pm$ 3.2 | 22.1 $\pm$ 1.1 | 4.6 $\pm$ 1.0 | 4.6 $\pm$ 0.8  | n.d.           | 5.1 $\pm$ 2.5 | 0.6 $\pm$ 1.0 | 0.6 $\pm$ 1.0 |
| Poly-L-Lysine* | 56.6 $\pm$ 6.8 | 24.6 $\pm$ 0.9 | 3.4 $\pm$ 0.8 | 5.6 $\pm$ 0.9  | n.d.           | 3.6 $\pm$ 1.9 | 2.9 $\pm$ 2.8 | 3.3 $\pm$ 3.2 |

**Tab. S2:** Probable design (from simulated spectra) of contaminating analytes found in the ethanolic leachate.

| Monoisotopic ion mass (singly charged) | Ion type                            | Formula for M                                                                     | Compound species                                        | References |
|----------------------------------------|-------------------------------------|-----------------------------------------------------------------------------------|---------------------------------------------------------|------------|
| 353.27                                 | [AB <sub>3</sub> +H] <sup>+</sup>   | [C <sub>15</sub> H <sub>24</sub> O][C <sub>2</sub> H <sub>4</sub> O] <sub>n</sub> | Triton, 101 detergent                                   | 1          |
| 354.06                                 | [M+H-CH <sub>4</sub> ] <sup>+</sup> | [C <sub>2</sub> H <sub>6</sub> SiO] <sub>5</sub>                                  | Polysiloxane (neutral methane loss from <i>m/z</i> 371) | 2          |

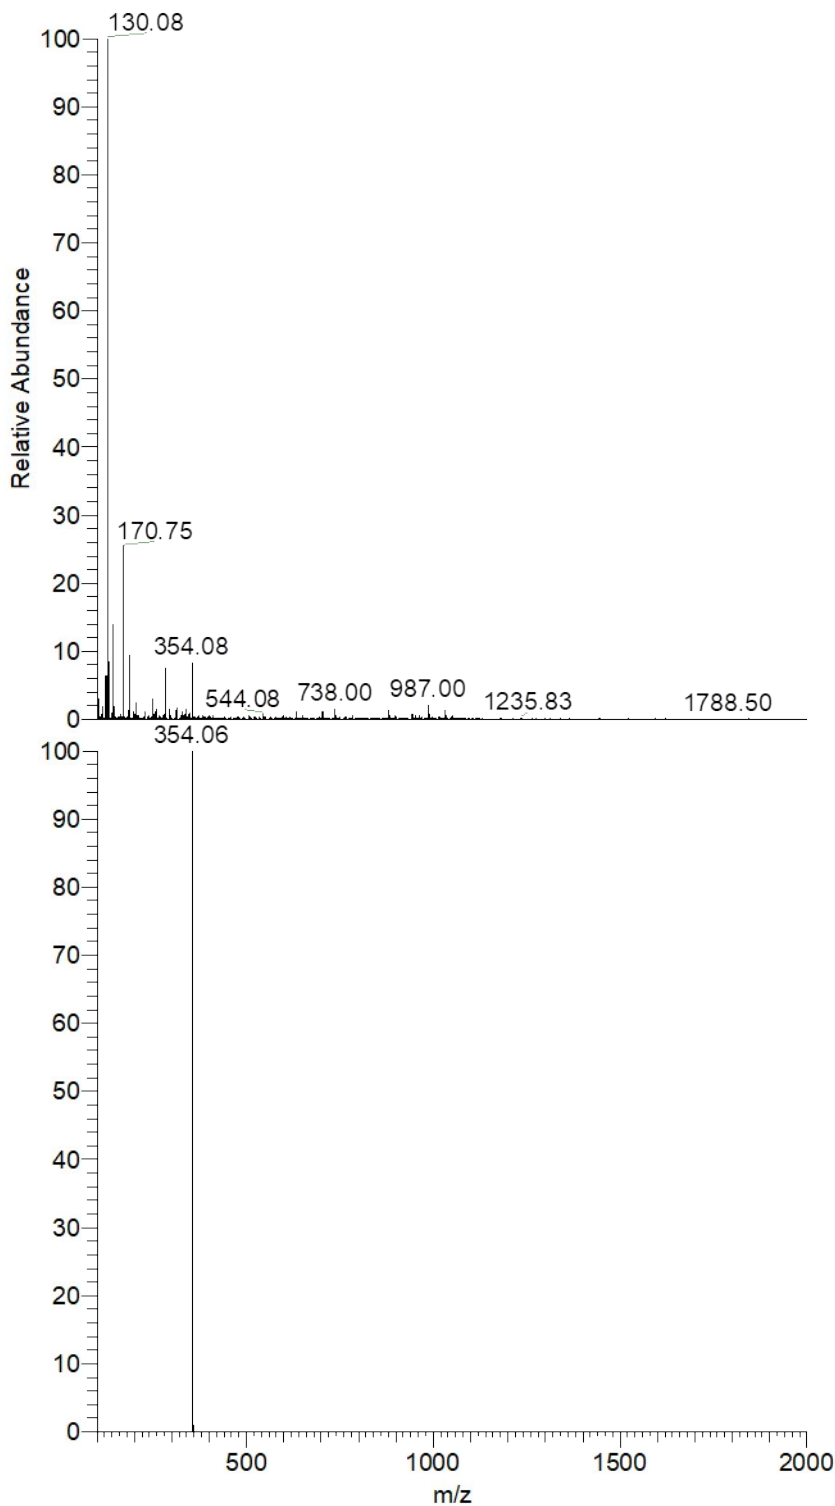

NL:  
 1.90E3  
 Prist\_EtOH\_72h\_APCI-  
 P\_quickMS150Acn\_25uL#36-  
 76 RT: 0.53-1.11 AV: 41 F:  
 ITMS + p APCI corona Full ms  
 [100.00-2000.00]

NL:  
 5.97E5  
 $(C_2 H_6 SiO)_4 CH_2 SiO$ :  
 $O_5 Si_5 H_{26} C_9$   
 pa Chrg 1

**Fig. S1:** Spectra of pristine oste322 insert incubated in ethanol for 72 hours. (Upper graph) MS spectrum measured in APCI-Positive mode. (Bottom graph) simulated spectrum of the probable leached material (Polysiloxane).

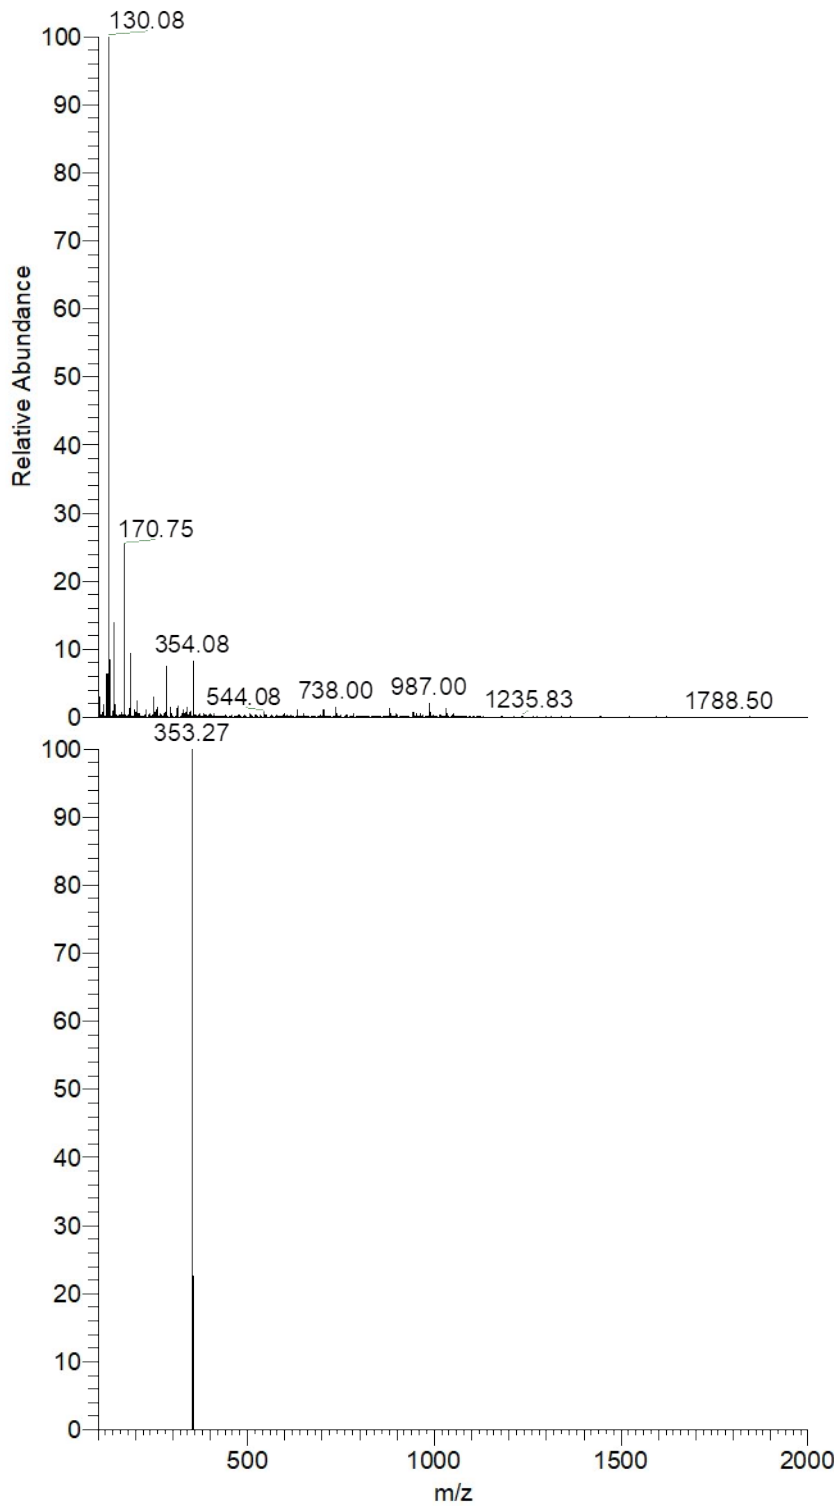

NL:  
 1.90E3  
 Prist\_EtOH\_72h\_APCI-  
 P\_quickMS150Acn\_25uL#36-  
 76 RT: 0.53-1.11 AV: 41 F:  
 ITMS + p APCI corona Full ms  
 [100.00-2000.00]

NL:  
 7.87E5  
 $C_{15}H_{24}O(C_2H_4O)_3H$ :  
 $C_{21}H_{37}O_4$   
 pa Chrg 1

**Fig. S2:** Spectra of pristine oste322 insert incubated in ethanol for 72 hours. (Upper graph) MS spectrum measured in APCI-Positive mode. (Bottom graph) simulated spectrum of the probable leached material (Triton 101).

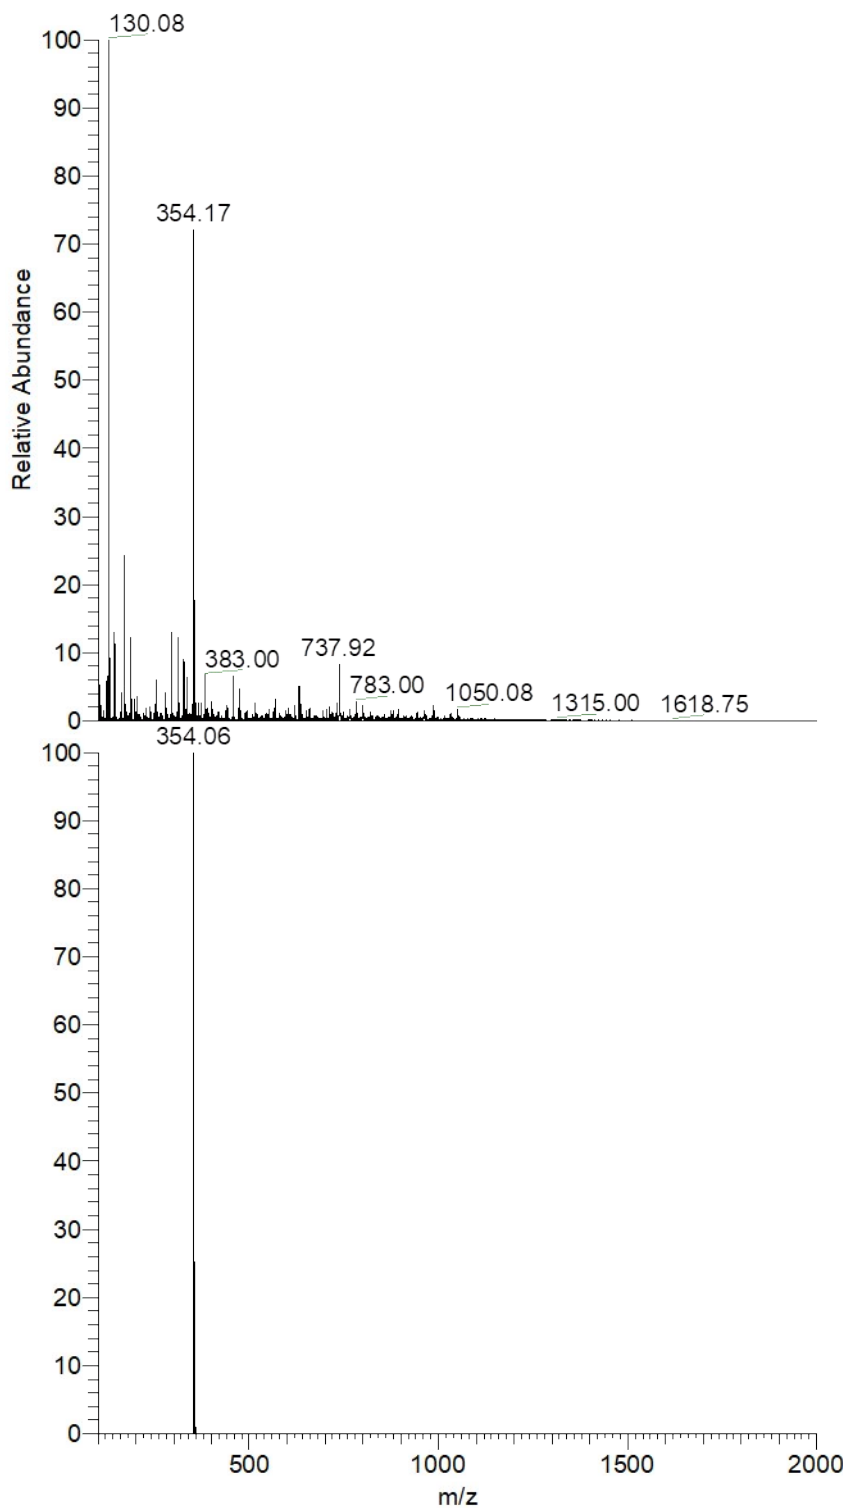

NL:  
 2.14E3  
 O2\_EtOH\_72h\_APCI-  
 P\_quickMS150Acn\_25uL#35-  
 84 RT: 0.53-1.18 AV: 50 F:  
 ITMS + p APCI corona Full ms  
 [100.00-2000.00]

NL:  
 5.97E5  
 $(C_2 H_6 SiO)_4 CH_2 SiO$ :  
 $O_5 Si_5 H_{26} C_9$   
 pa Chrg 1

**Fig. S3:** Spectra of oxygen plasma treated oste322 insert incubated in ethanol for 72 hours. (Upper graph) MS spectrum measured in APCI-Positive mode. (Bottom graph) simulated spectrum of the probable leached material (Polysiloxane).

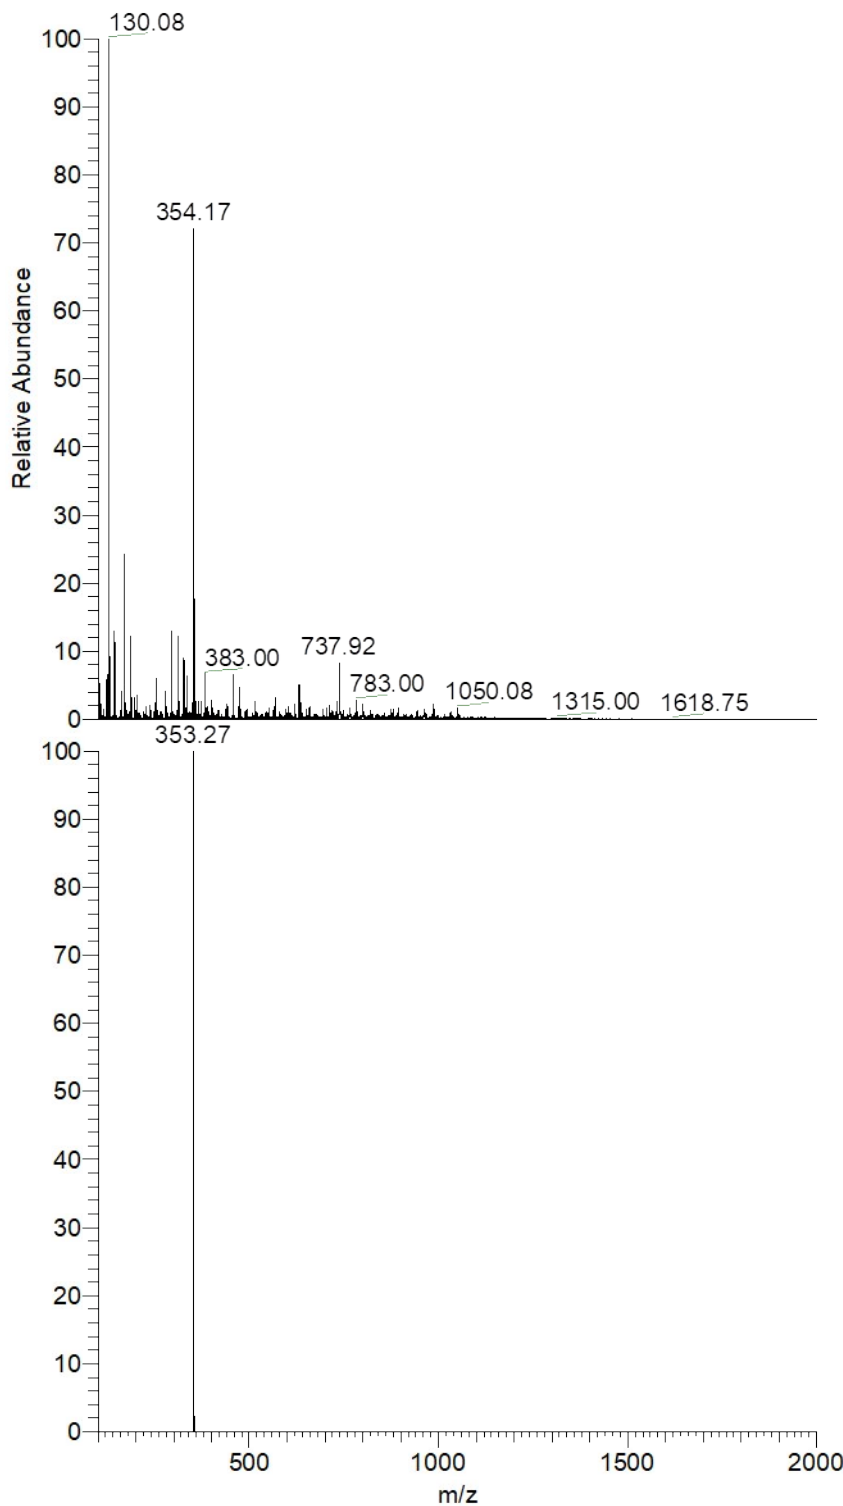

NL:  
 2.14E3  
 O2\_EtOH\_72h\_APCI-  
 P\_quickMS150Acn\_25uL#35-  
 84 RT: 0.53-1.18 AV: 50 F:  
 ITMS + p APCI corona Full ms  
 [100.00-2000.00]

NL:  
 7.87E5  
 $C_{15}H_{24}O(C_2H_4O)_3H$ :  
 $C_{21}H_{37}O_4$   
 pa Chrg 1

**Fig. S4:** Spectra of oxygen plasma treated oste322 insert incubated in ethanol for 72 hours. (Upper graph) MS spectrum measured in APCI-Positive mode. (Bottom graph) simulated spectrum of the probable leached material (Triton 101).

## References

- 1 B. O. Keller, J. Sui, A. B. Young and R. M. Whittal, *Analytica Chimica Acta*, 2008, **627**, 71–81.
- 2 A. Schlosser and R. Volkmer-Engert, *J. Mass Spectrom.*, 2003, **38**, 523–525.
